# Supplementary material for: Factors Influencing the Distribution of Endemic Damselflies in Vanuatu
Source: MDPI journal article supplement (doi:10.3390/insects12080670), 2021-07-26
Supplement: s1 [file s1]

**Supplementary Table S1:** GPS coordinates for each occurrence record of *Vanuatus* used in MaxEnt analyses

| <b>Pre-2017</b> |                 |                  |
|-----------------|-----------------|------------------|
| <b>Island</b>   | <b>Latitude</b> | <b>Longitude</b> |
| Santo           | -15.2098        | 166.6771         |
| Santo           | -15.2175        | 166.6871         |
| Santo           | -14.9611        | 166.6332         |
| Aneityum        | -20.218         | 169.8012         |
| Aneityum        | -20.2103        | 169.8083         |
| Aneityum        | -20.2194        | 169.7733         |
| Malekula        | -16.1435        | 167.4671         |
| <b>2018</b>     |                 |                  |
|                 | -               |                  |
| Malekula        | 16.107861       | 167.327444       |
| Malekula        | -16.083         | 167.275          |
|                 | -               |                  |
| Malekula        | 16.145944       | 167.465333       |
|                 | -               |                  |
| Malekula        | 16.221361       | 167.571611       |
|                 | -               |                  |
| Malekula        | 15.927333       | 167.318083       |
|                 | -               |                  |
| Malekula        | 15.968556       | 167.339667       |
|                 | -               |                  |
| Malekula        | 16.114278       | 167.420389       |
|                 | -               |                  |
| Santo           | 15.295705       | 167.161609       |
| Santo           | -15.5538        | 166.9814         |
| Santo           | -15.6275        | 166.853972       |
|                 | -               |                  |
| Santo           | 15.607787       | 166.784943       |
|                 | -               |                  |
| Santo           | 15.629558       | 166.842575       |
|                 | -               |                  |
| Santo           | 15.382895       | 167.095869       |
| Santo           | -15.57815       | 167.002433       |
|                 | -               |                  |
| Efate           | 17.675229       | 168.254133       |
| Efate           | -17.42.840      | 168.34.129       |
| <b>2019</b>     |                 |                  |
| Efate           | -17.7142        | 168.5688         |
| Malekula        | -16.1079        | 167.3273         |

|           |          |          |
|-----------|----------|----------|
| Malekula  | -16.1435 | 167.4671 |
| Malekula  | -15.9256 | 167.3192 |
| Malekula  | -15.904  | 167.2772 |
| Malekula  | -15.9803 | 167.1928 |
| Malekula  | -16.2208 | 167.5723 |
| Malekula  | -16.2475 | 167.6168 |
| Malekula  | -16.2292 | 167.6034 |
| Malekula  | -16.0787 | 167.2726 |
| Maewo     | -15.1263 | 168.0937 |
| Maewo     | -15.1191 | 168.0891 |
| Maewo     | -15.1178 | 168.0871 |
| Santo     | -15.2955 | 167.1614 |
| Maewo     | -15.2067 | 168.112  |
| Maewo     | -15.2034 | 168.1132 |
| Maewo     | -15.198  | 168.1138 |
| Maewo     | -15.1901 | 168.1107 |
| Maewo     | -15.1811 | 168.1137 |
| Maewo     | -14.9547 | 168.0596 |
| Maewo     | -14.96   | 168.0614 |
| Maewo     | -14.9611 | 168.0614 |
| Maewo     | -14.9628 | 168.0604 |
| Maewo     | -14.9626 | 168.0605 |
| Maewo     | -14.965  | 168.0609 |
| Maewo     | -14.9654 | 168.0604 |
| Maewo     | -15.113  | 168.0926 |
| Maewo     | -15.0119 | 168.0667 |
| Pentecost | -15.931  | 168.1897 |
| Pentecost | -15.9581 | 168.1959 |
| Pentecost | -15.9589 | 168.1948 |
| Pentecost | -15.9685 | 168.1922 |
| Pentecost | -15.8126 | 168.177  |
| Pentecost | -15.8886 | 168.1803 |
| Pentecost | -15.9088 | 168.1904 |
| Efate     | -17.6754 | 168.2559 |
| Efate     | -17.5768 | 168.2959 |

**Supplementary Table S2:** GPS coordinates with corresponding pH data

| <b>Island</b> | <b>Latitude</b> | <b>Longitude</b> | <b>pH</b> | <b>Presence</b> |
|---------------|-----------------|------------------|-----------|-----------------|
| Efate         | -17.7142        | 168.5688         | 8.24      | Yes             |
| Malekula      | -16.1079        | 167.3273         | 8.72      | Yes             |
| Malekula      | -16.1435        | 167.4671         | 8.70      | Yes             |
| Malekula      | -15.9256        | 167.3192         | 8.77      | Yes             |
| Malekula      | -16.2208        | 167.5723         | 8.40      | Yes             |
| Malekula      | 16.2475         | 167.6168         | 8.34      | Yes             |
| Malekula      | -16.2215        | 167.5781         | 8.45      | Yes             |
| Malekula      | -16.0787        | 167.2726         | 8.78      | Yes             |
| Ambrym        | -16.2991        | 168.0877         | 7.86      | No              |
| Ambrym        | -16.3533        | 168.0944         | 7.84      | No              |
| Santo         | 15.5833         | 167.0456         | 7.94      | No              |
| Santo         | -15.5781        | 167.0022         | 8.51      | Yes             |
| Santo         | -15.3704        | 167.185          | 7.67      | No              |
| Santo         | -15.2955        | 167.1614         | 8.07      | Yes             |
| Maewo         | -15.1263        | 168.0937         | 8.82      | Yes             |
| Maewo         | -15.1191        | 168.0891         | 8.75      | Yes             |
| Maewo         | -15.2034        | 168.1132         | 8.75      | Yes             |
| Maewo         | -15.1980        | 168.1138         | 8.70      | Yes             |
| Maewo         | -15.1901        | 168.1107         | 7.76      | Yes             |
| Maewo         | -15.1811        | 168.1137         | 8.20      | Yes             |
| Maewo         | -14.9547        | 168.0596         | 8.62      | Yes             |
| Maewo         | -14.9600        | 168.0614         | 8.36      | Yes             |
| Maewo         | -14.9611        | 168.0614         | 8.52      | Yes             |
| Maewo         | -14.9626        | 168.0605         | 8.52      | Yes             |
| Maewo         | -14.9650        | 168.0609         | 8.19      | Yes             |
| Maewo         | -14.9654        | 168.0604         | 8.32      | Yes             |
| Maewo         | -15.1130        | 168.0926         | 8.45      | Yes             |
| Maewo         | -15.0119        | 168.0667         | 8.39      | Yes             |
| Pentecost     | -15.9310        | 168.1897         | 8.67      | Yes             |
| Pentecost     | -15.9581        | 168.1959         | 8.62      | Yes             |
| Pentecost     | -15.9589        | 168.1948         | 8.10      | Yes             |
| Pentecost     | -15.8126        | 168.177          | 8.49      | Yes             |
| Pentecost     | -15.8886        | 168.1803         | 7.90      | Yes             |
| Pentecost     | -15.9088        | 168.1904         | 8.41      | Yes             |
| Tanna         | -19.4318        | 169.295          | 7.21      | No              |
| Tanna         | -19.4489        | 169.3082         | 6.97      | No              |
| Tanna         | -19.4245        | 169.3499         | 8.33      | No              |

|       |          |          |      |     |
|-------|----------|----------|------|-----|
| Tanna | -19.4179 | 169.3484 | 7.31 | No  |
| Tanna | -19.5798 | 169.3101 | 8.34 | No  |
| Tanna | -19.6389 | 169.391  | 8.11 | No  |
| Efate | -17.6754 | 168.2559 | 8.24 | Yes |
| Efate | -17.5768 | 168.2959 | 8.19 | Yes |
